# Supplementary material for: Electrochemical semi-sacrificial growth of a self-supporting MOF-based electrode for urea electrooxidation-coupled water electrolysis
Source: Royal Society of Chemistry journal article supplement (doi:10.1039/d3ce00289f), 2023-01-01
Supplement: d3ce00289f1.pdf [file d3ce00289f1.pdf]

## Supplementary Information

Electrochemical semi-sacrificial growth of self-supporting MOF-based electrode for urea electrooxidation-coupled water electrolysis

Jiang Ji<sup>a,b</sup>, Yinsheng Wang<sup>a,b</sup>, Changsheng Cao<sup>b,\*</sup>, Xin-Tao Wu<sup>b</sup>, and Qi-Long Zhu<sup>b,\*</sup>

<sup>a</sup>*College of Chemistry, Fuzhou University, Fuzhou 350002, China*

<sup>b</sup>*State Key Laboratory of Structural Chemistry and Fujian Provincial Key Laboratory of Materials and Techniques toward Hydrogen Energy, Fujian Institute of Research on the Structure of Matter, Chinese Academy of Sciences, Fuzhou 350002, China*

*\*Corresponding author.*

*E-mail addresses: cscao@fjirsm.ac.cn (C. Cao), and qlzhu@fjirsm.ac.cn (Q.-L. Zhu).*

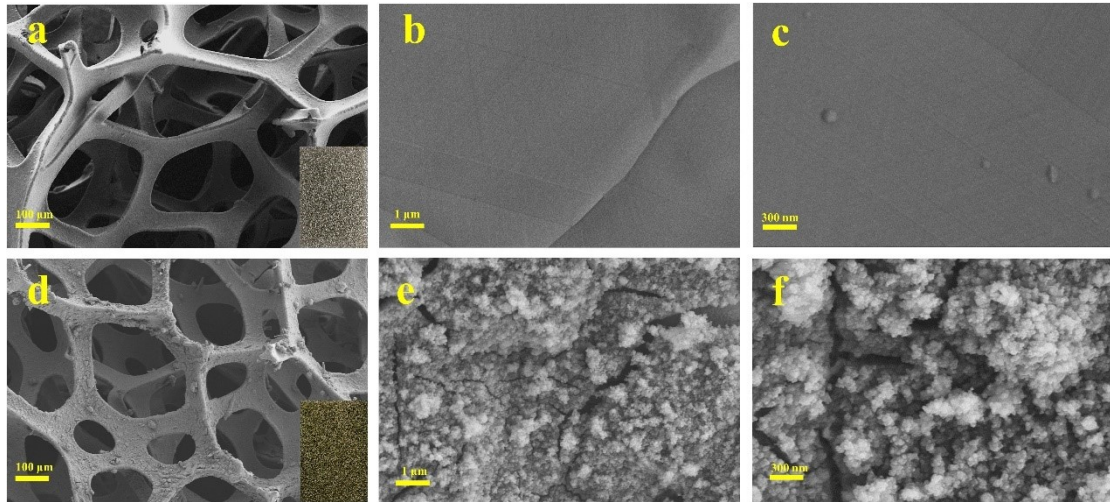

**Fig. S1** SEM images of (a-c) NF and (d-f) NiFe-PBA-NF. Insets in (a) and (d) are the corresponding optical photos.

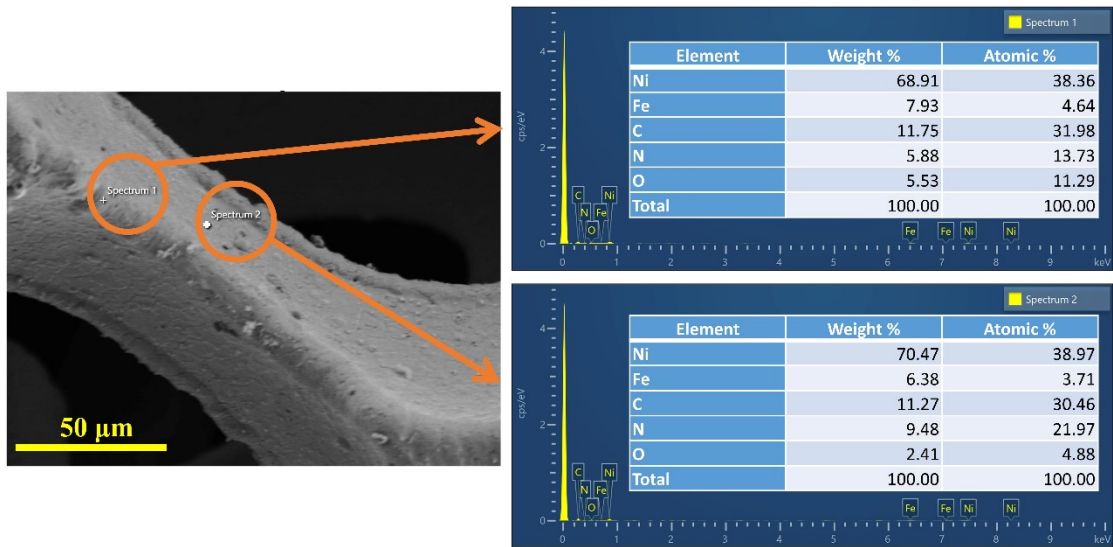

**Fig. S2** SEM-EDX spectra of NiFe-PBA-NF.

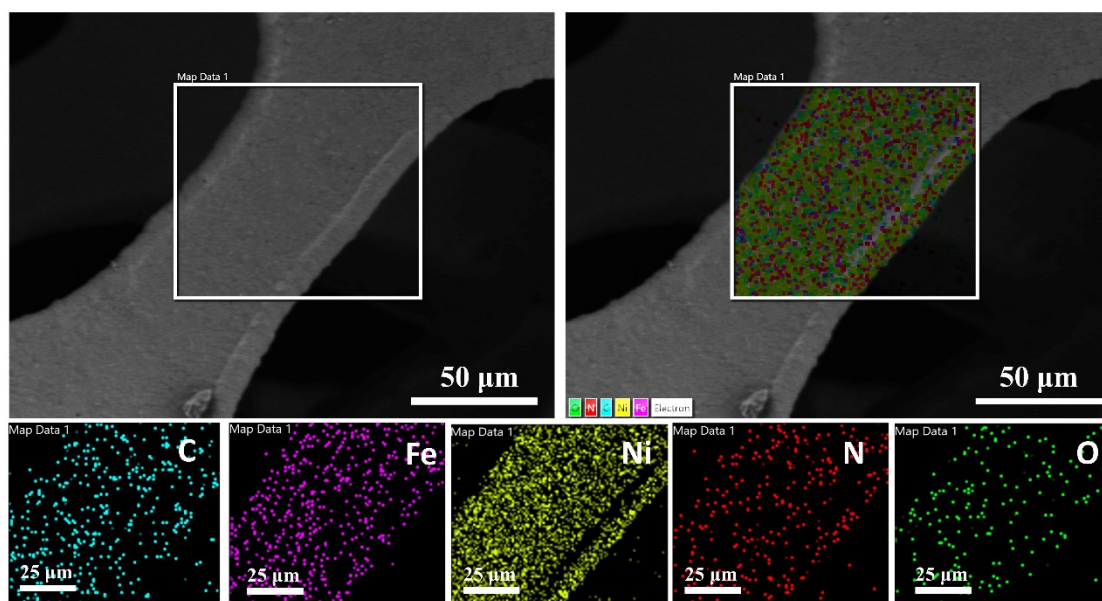

**Fig. S3** SEM-EDX elemental mapping images of NiFe-PBA-NF.

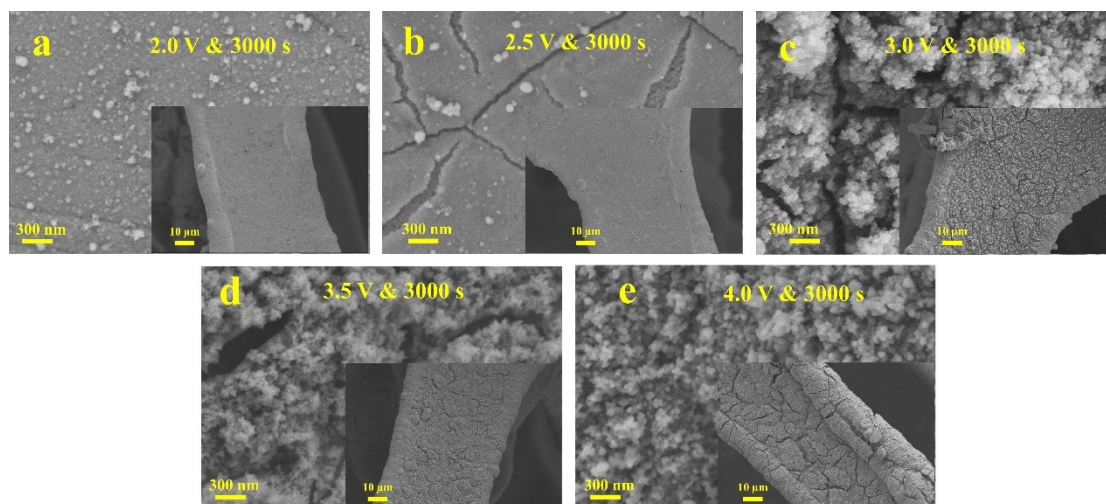

**Fig. S4** SEM images of the NiFe-PBA-NF electrodes fabricated at different applied potentials with 3000 s.

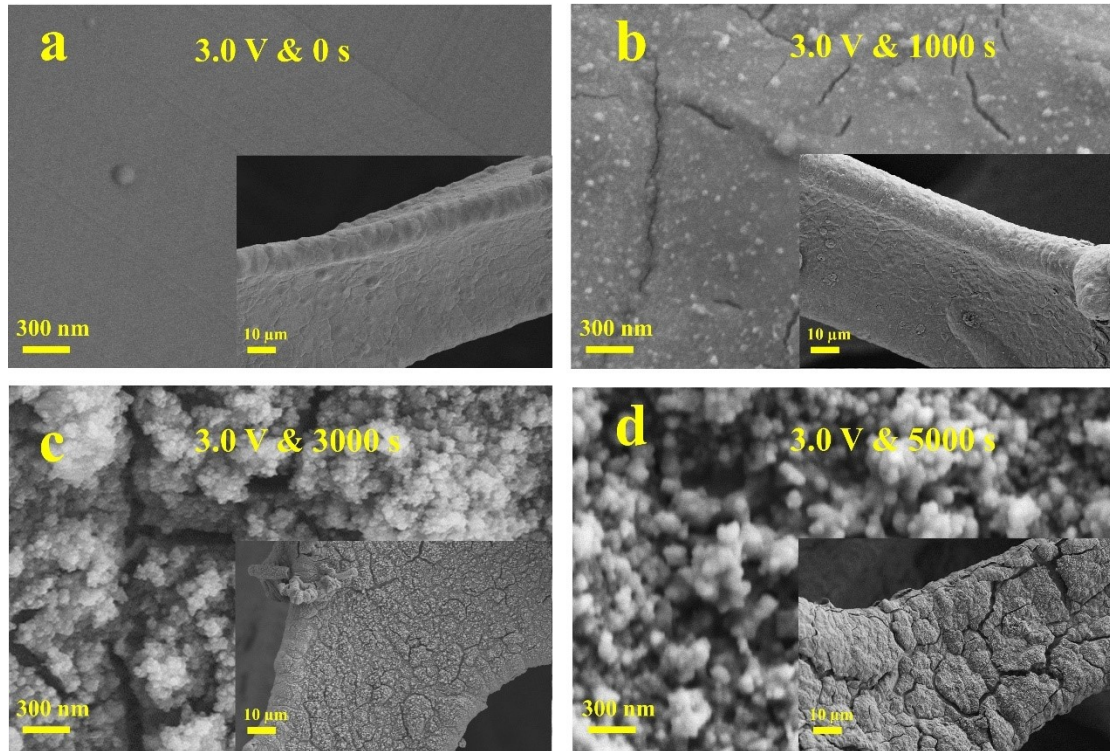

**Fig. S5** SEM images of the NiFe-PBA-NF electrodes fabricated at 3.0 V with different reaction time.



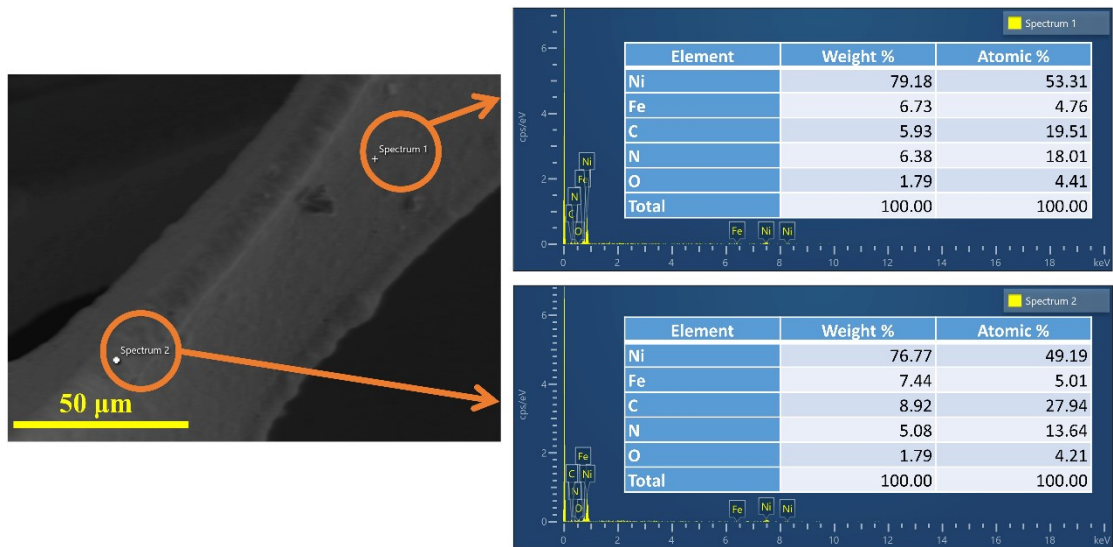

**Fig. S6** SEM-EDX spectra of the NiFe-PBA-NF electrode fabricated at 2.5 V with reaction time of 3000 s.

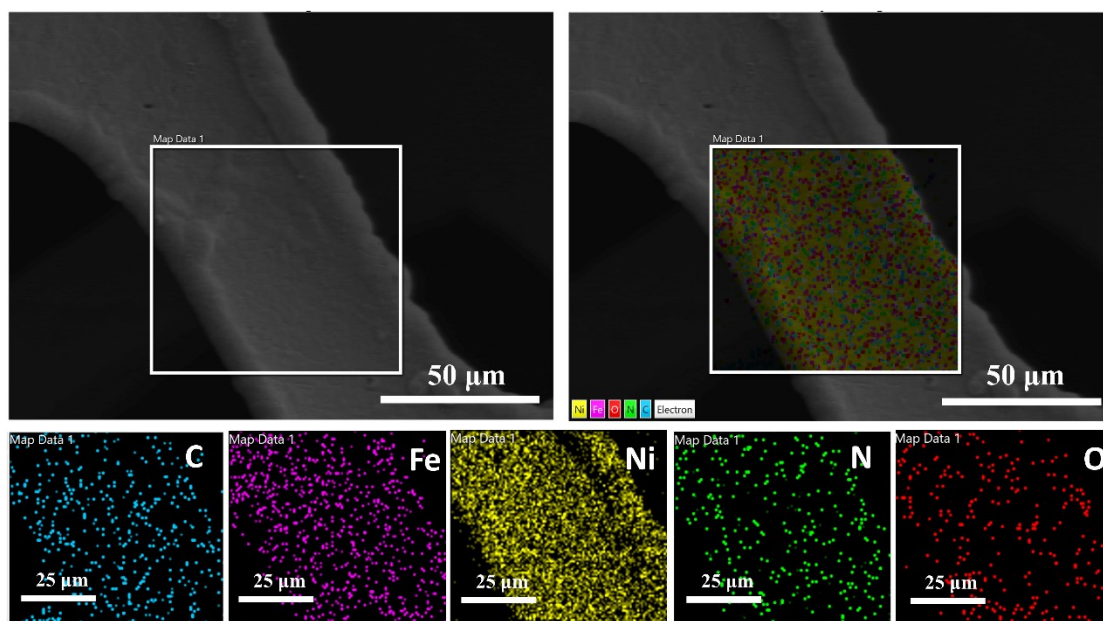

**Fig. S7** SEM-EDX elemental mapping images of the NiFe-PBA-NF electrode fabricated at 2.5 V with reaction time of 3000 s.



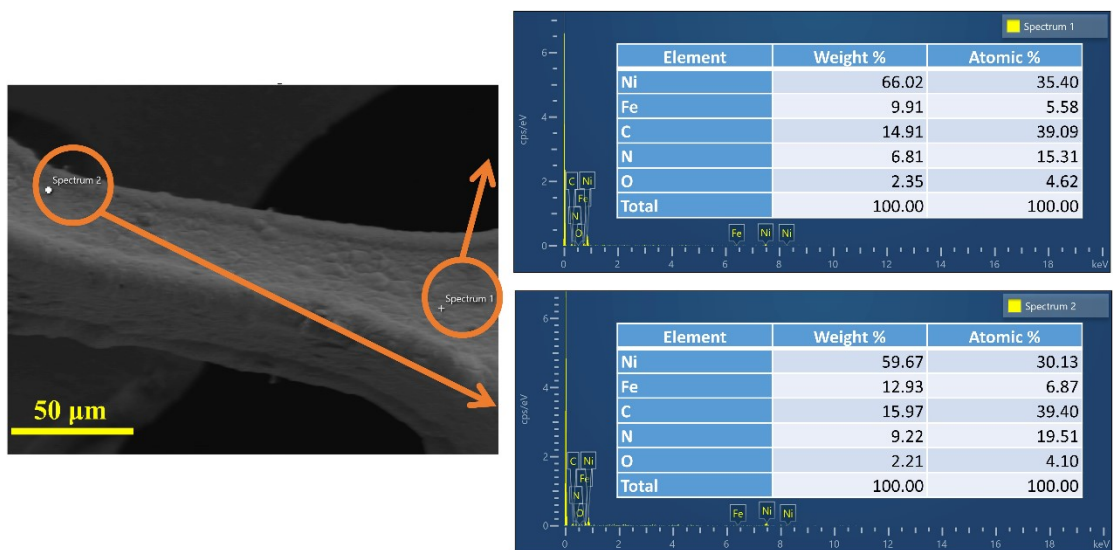

**Fig. S8** SEM-EDX spectra of the NiFe-PBA-NF electrode fabricated at 3.5 V with reaction time of 3000 s.

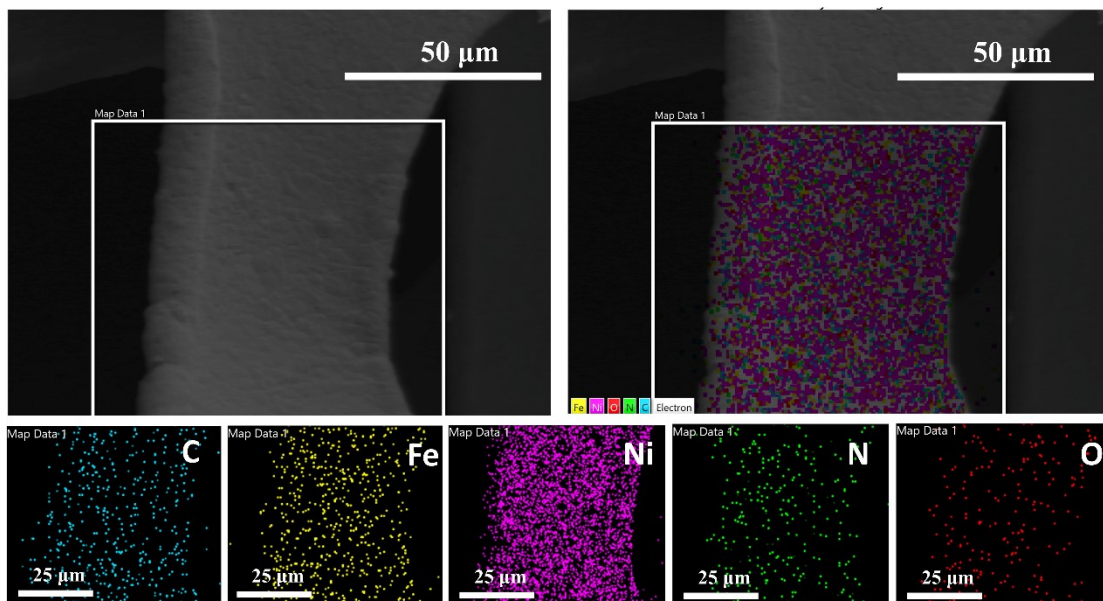

**Fig. S9** SEM-EDX elemental mapping images of the NiFe-PBA-NF electrode fabricated at 3.5 V with reaction time of 3000 s.

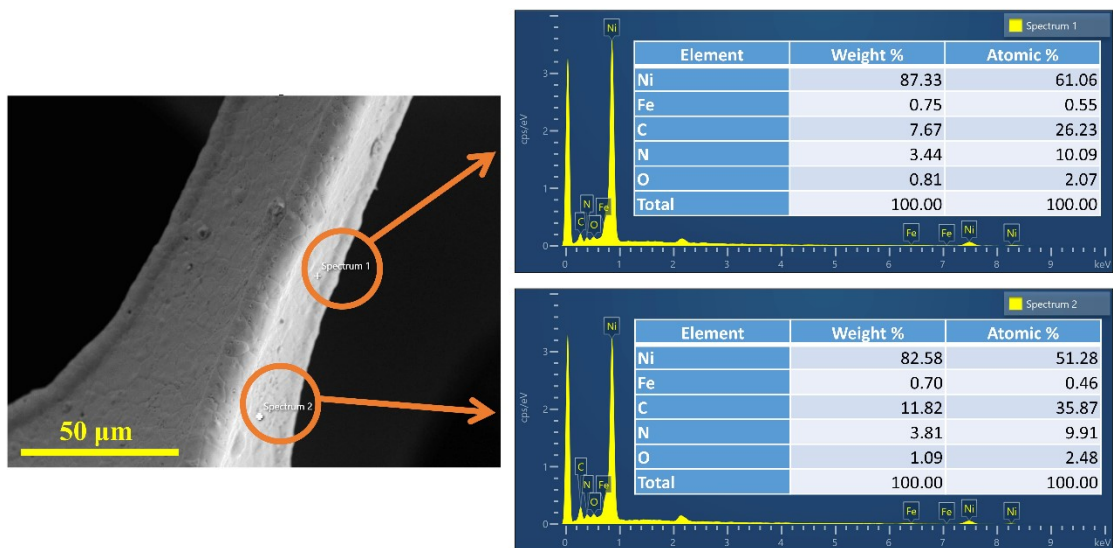

**Fig. S10** SEM-EDX spectra of the NiFe-PBA-NF electrode fabricated at 3.0 V with reaction time of 1000 s.

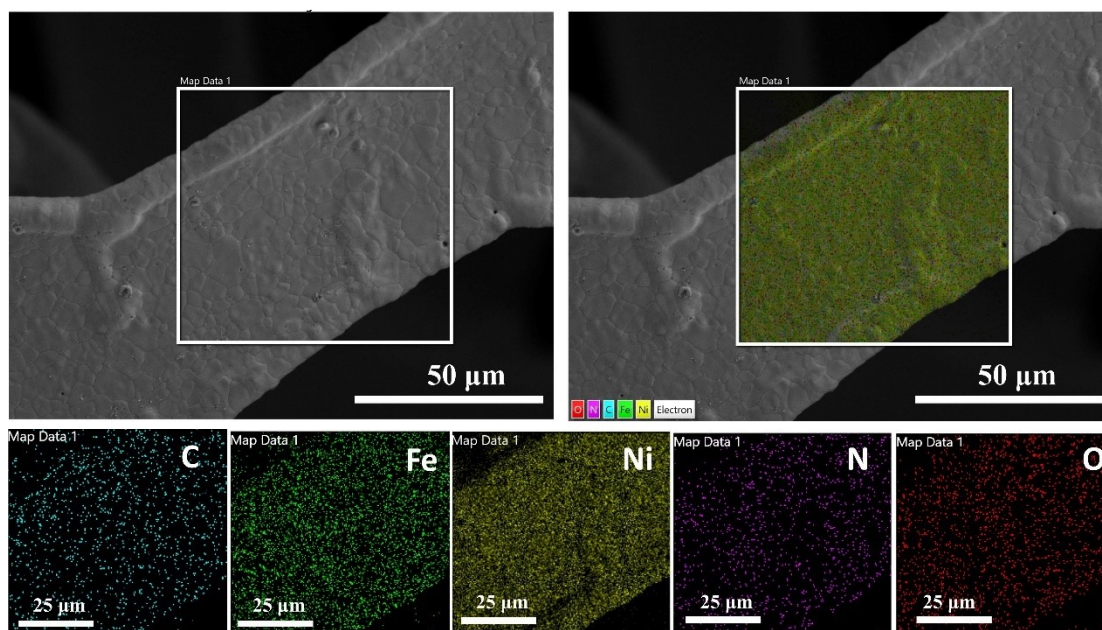

**Fig. S11** SEM-EDX elemental mapping images of the NiFe-PBA-NF electrode fabricated at 3.0 V with reaction time of 1000 s.

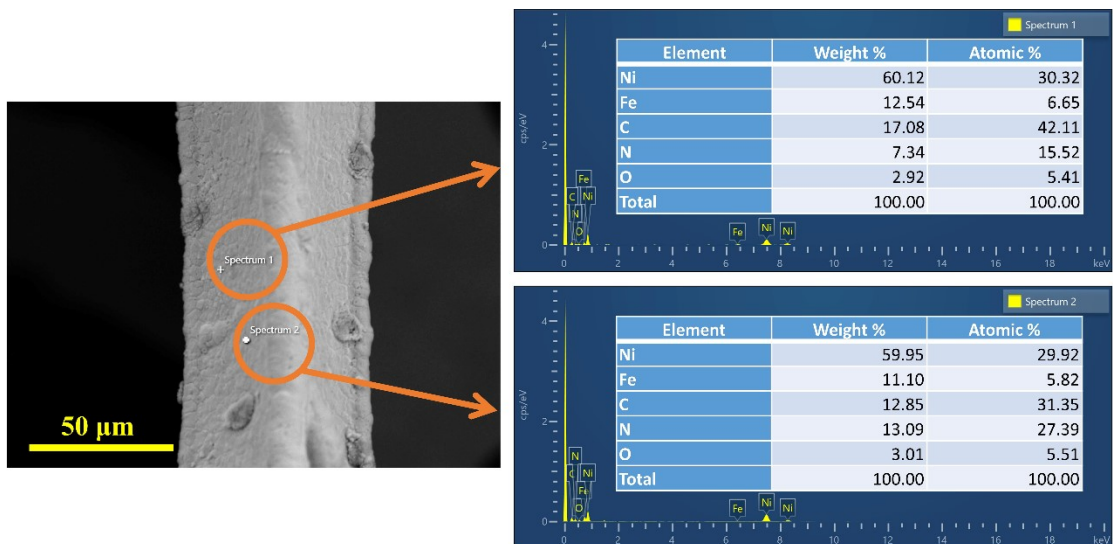

**Fig. S12** SEM-EDX spectra of the NiFe-PBA-NF electrode fabricated at 3.0 V with reaction time of 5000 s.

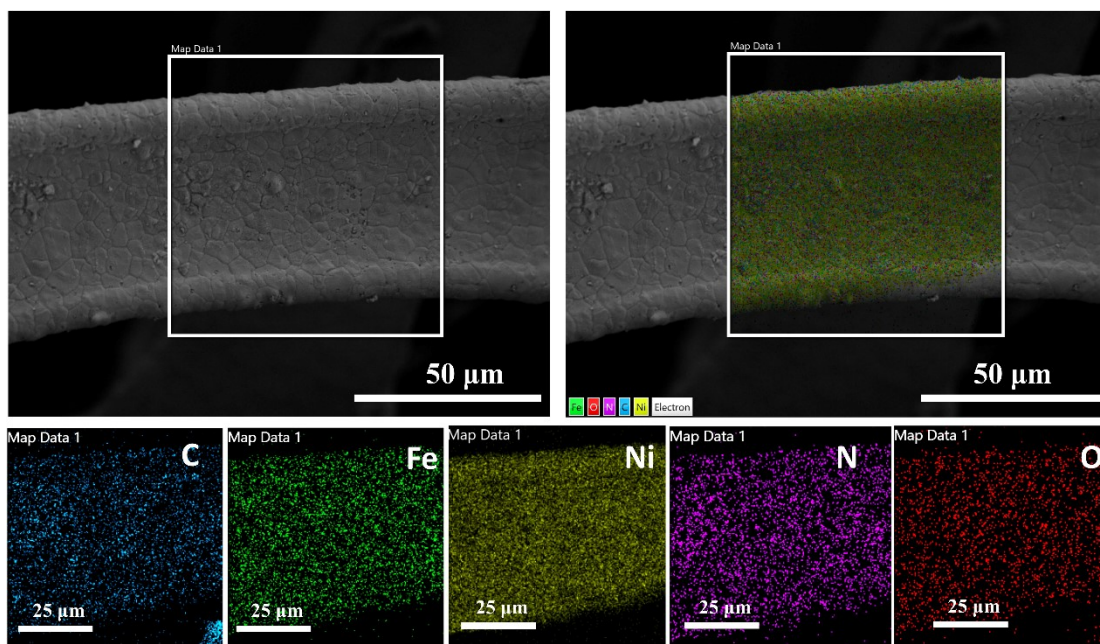

**Fig. S13** SEM-EDX elemental mapping images of the NiFe-PBA-NF electrode fabricated at 3.0 V with reaction time of 5000 s.



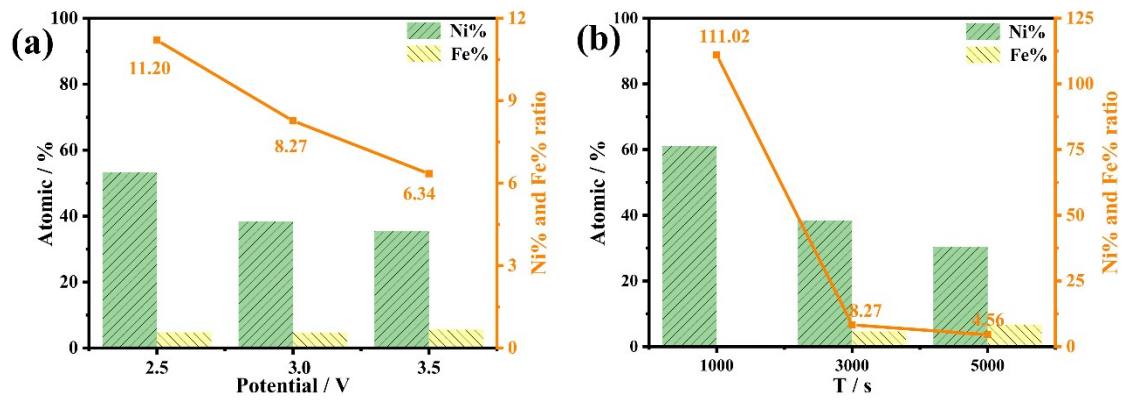

**Fig. S14** The Ni/Fe ratios of the NiFe-PBA-NF electrodes fabricated at (a) different applied potentials, and (b) different reaction time at 3.0 V.

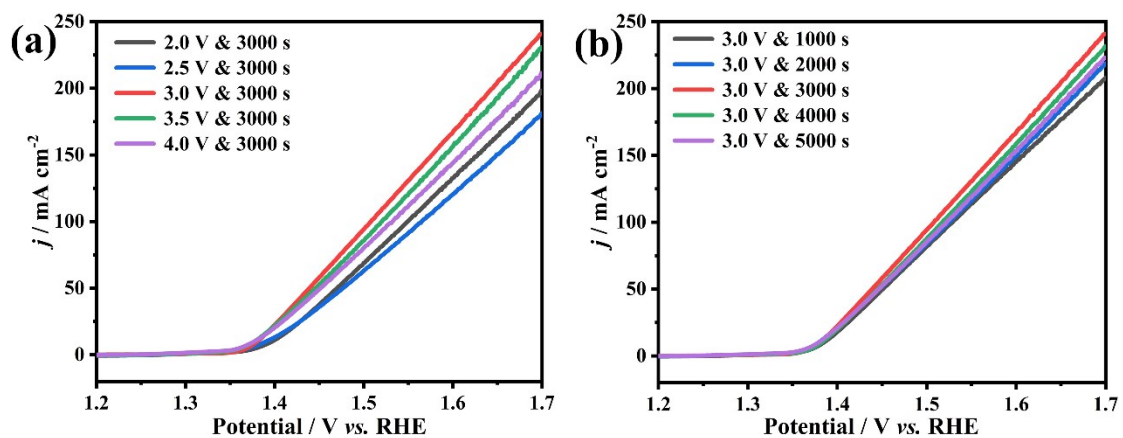

**Fig. S15** UOR performance of the as-prepared NiFe-PBA-NF electrodes at (a) different applied potentials and (b) different reaction time at 3.0 V.

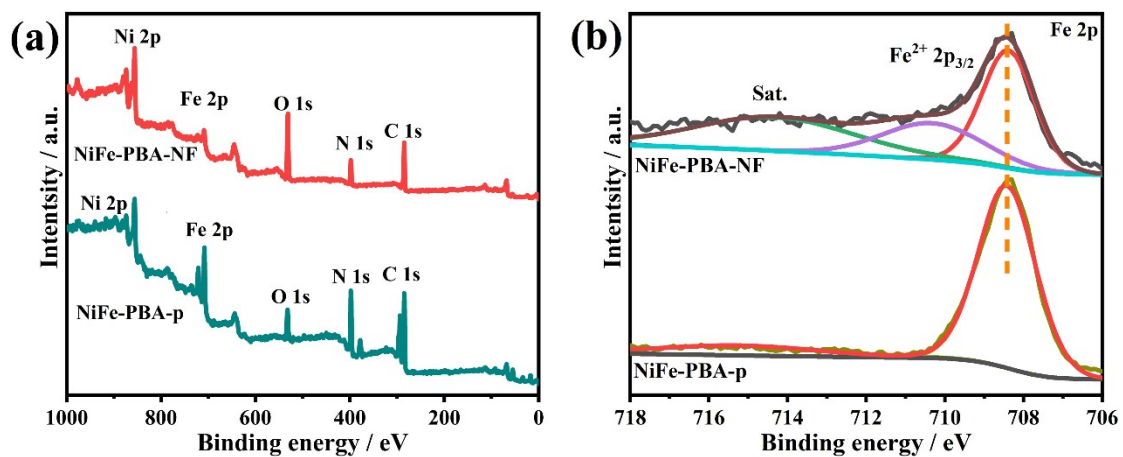

**Fig. S16** (a) Survey and (b) Fe 2p XPS spectra of NiFe-PBA-NF and NiFe-PBA-p.

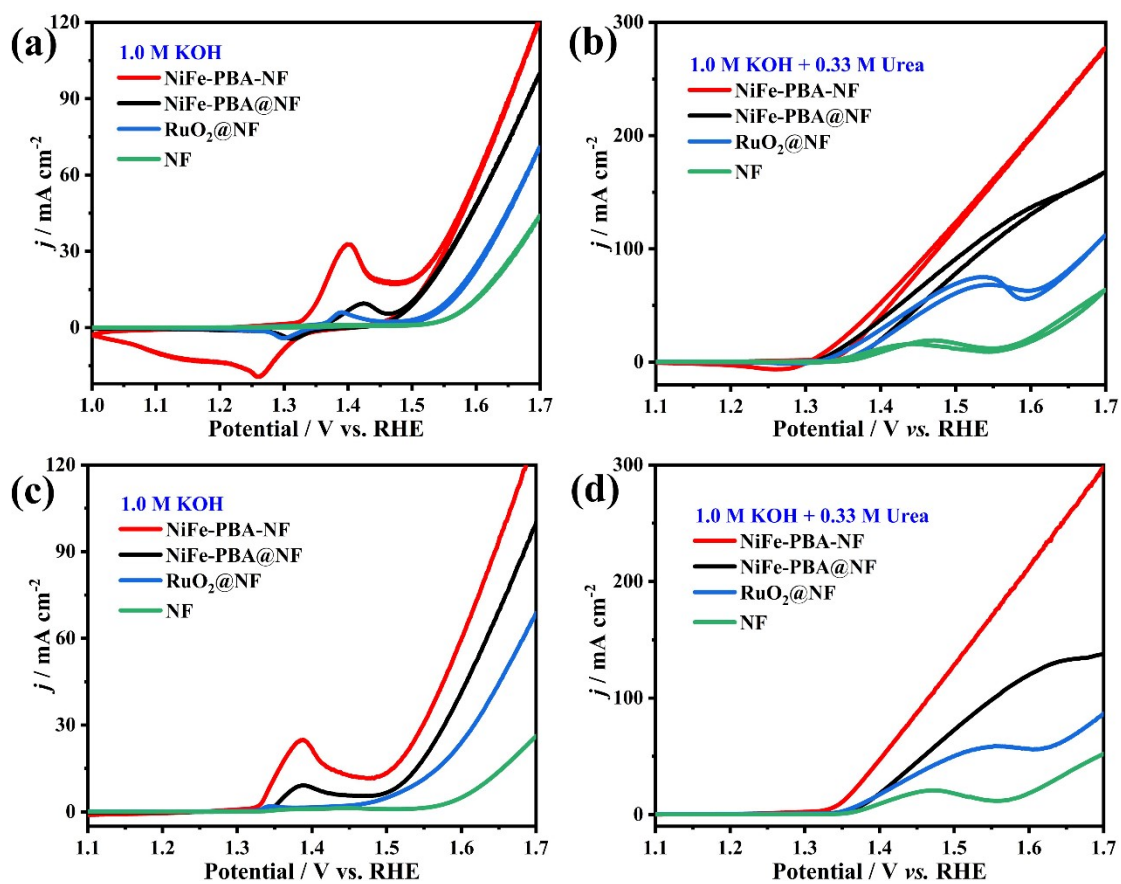

**Fig. S17** (a, b) CV and (c, d) LSV curves of NiFe-PBA-NF, NiFe-PBA@NF, RuO<sub>2</sub>@NF and NF in 1.0 M KOH with or without 0.33 M urea.

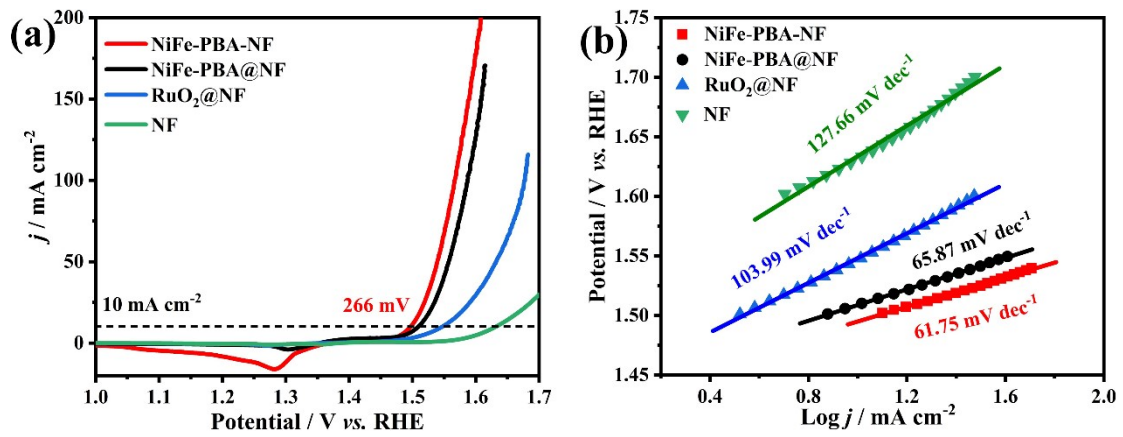

**Fig. S18** (a) LSV curves of the as-prepared electrodes in the reverse sweep direction and (b) the corresponding Tafel plots in 1.0 M KOH.

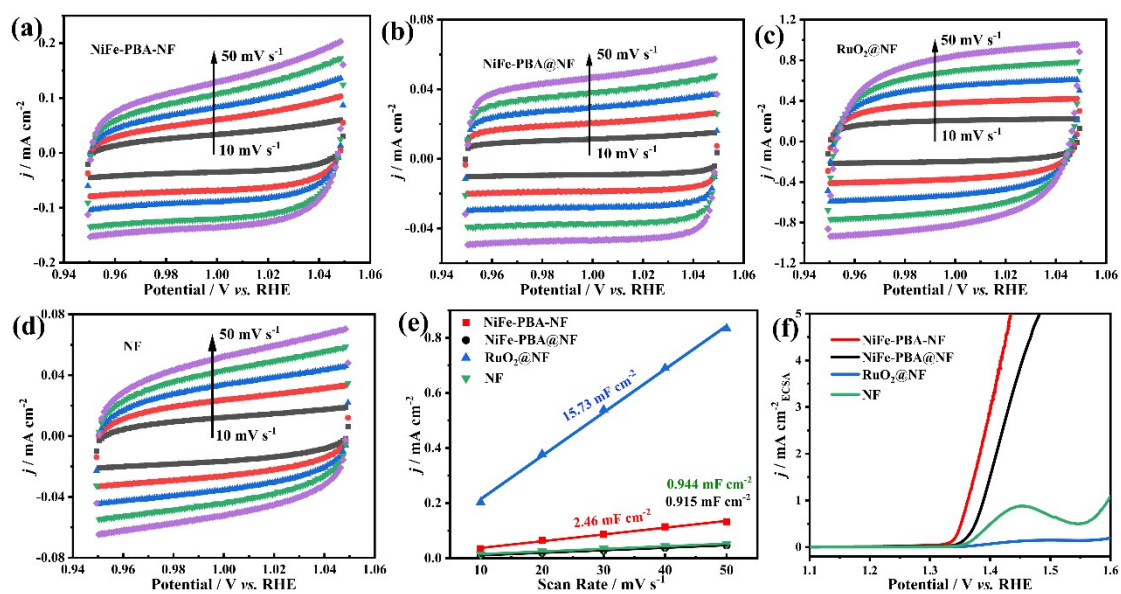

**Fig. S19** ECSA measurements for NiFe-PBA-NF, NiFe-PBA@NF, RuO<sub>2</sub>@NF and NF in 1.0 M KOH with 0.33 M urea. (a-d) CV curves at different scan rates. (e) Capacitance  $\Delta j$  ( $=j_a - j_c$ ) against scan rates. (f) LSV curves normalized by ECSAs.



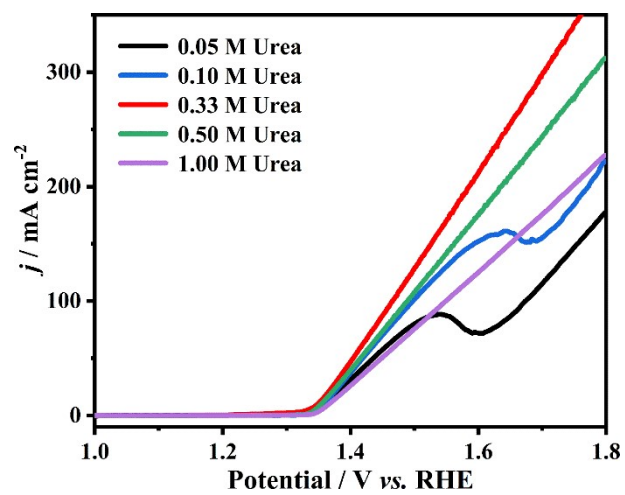

**Fig. S20** LSV curves of NiFe-PBA-NF collected in 1.0 M KOH with different concentrations of urea.

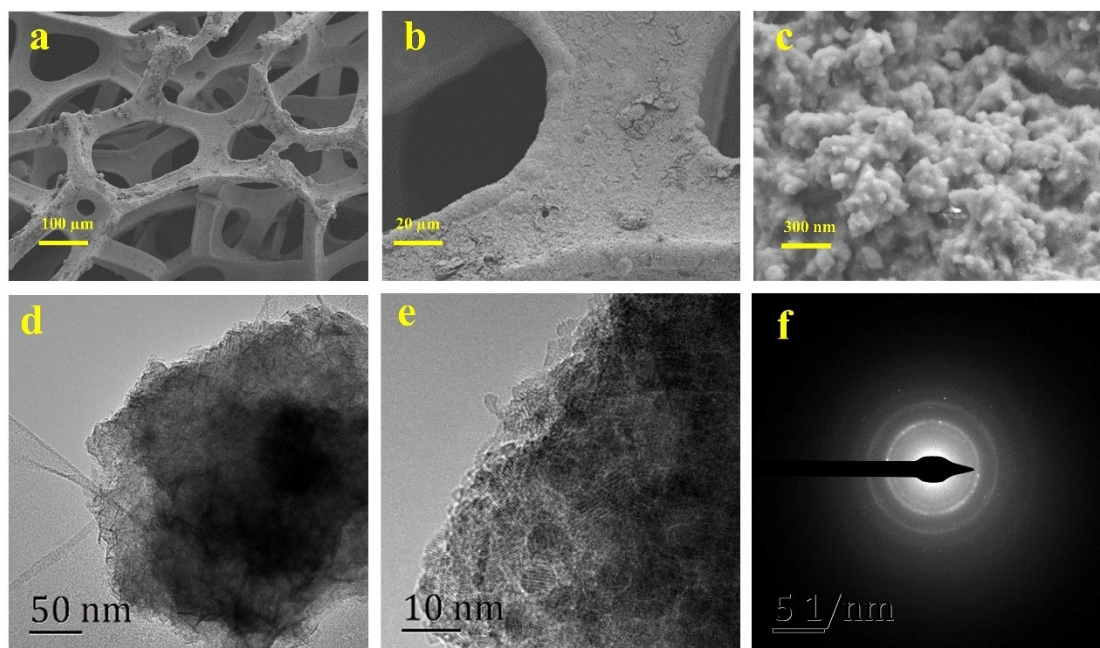

**Fig. S21** (a-c) SEM and (d, e) TEM images, and (f) selected area electron diffraction pattern (SAED) pattern of NiFe-PBA-NF after UOR measurement.

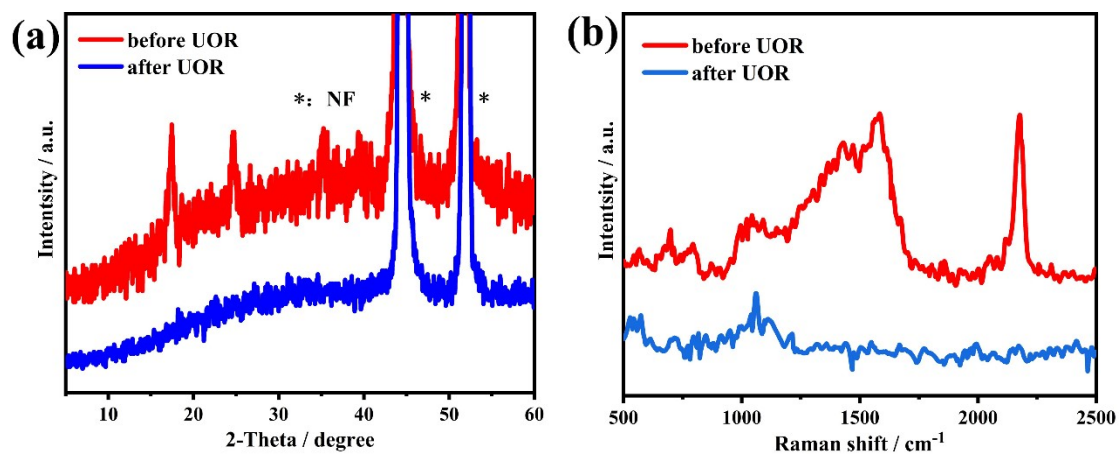

**Fig. S22** (a) PXRD patterns and (b) Raman spectra of NiFe-PBA-NF before and after UOR measurement.

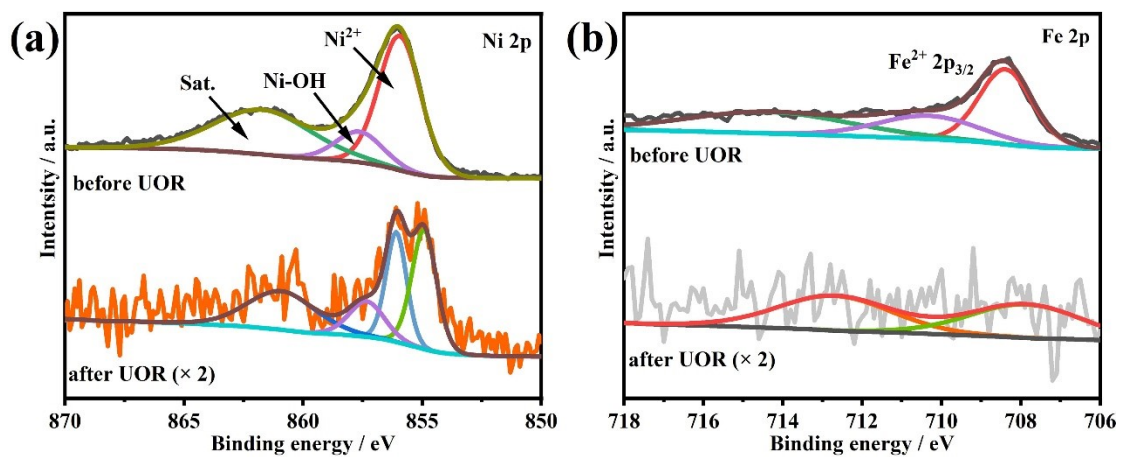

**Fig. S23** (a) Ni 2p and (b) Fe 2p spectra of NiFe-PBA-NF before and after UOR measurement.

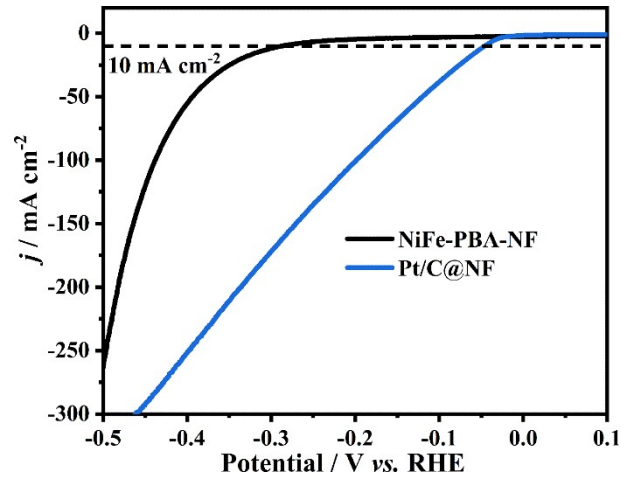

**Fig. S24** LSV curves of NiFe-PBA-NF and Pt/C@NF in 1.0 M KOH with 0.33 M urea.

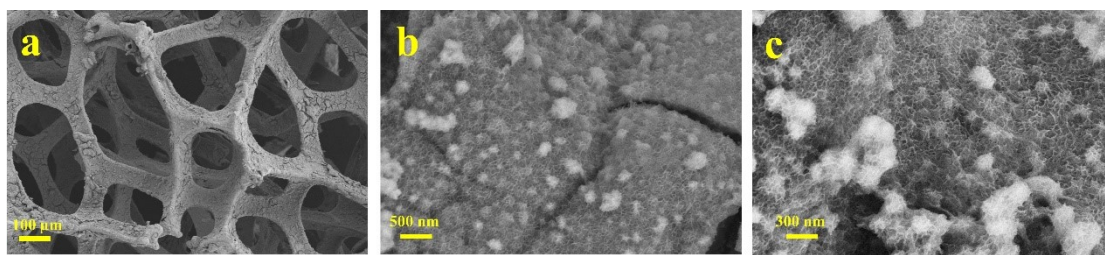

**Fig. S25** SEM images of Ru-NiFe-PBA-NF.



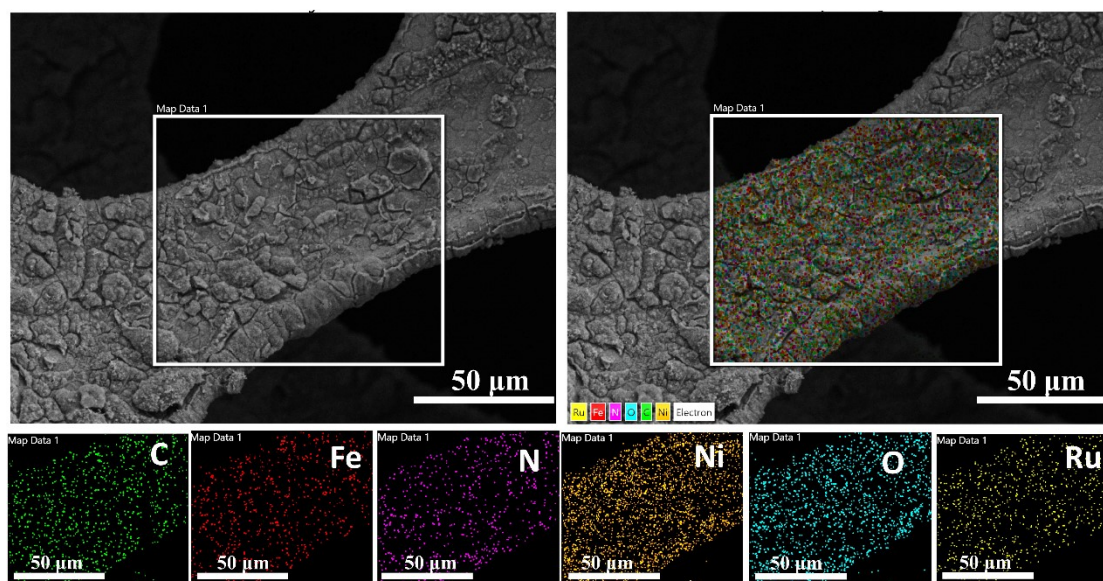

**Fig. S26** SEM-EDX elemental mapping images of Ru-NiFe-PBA-NF.

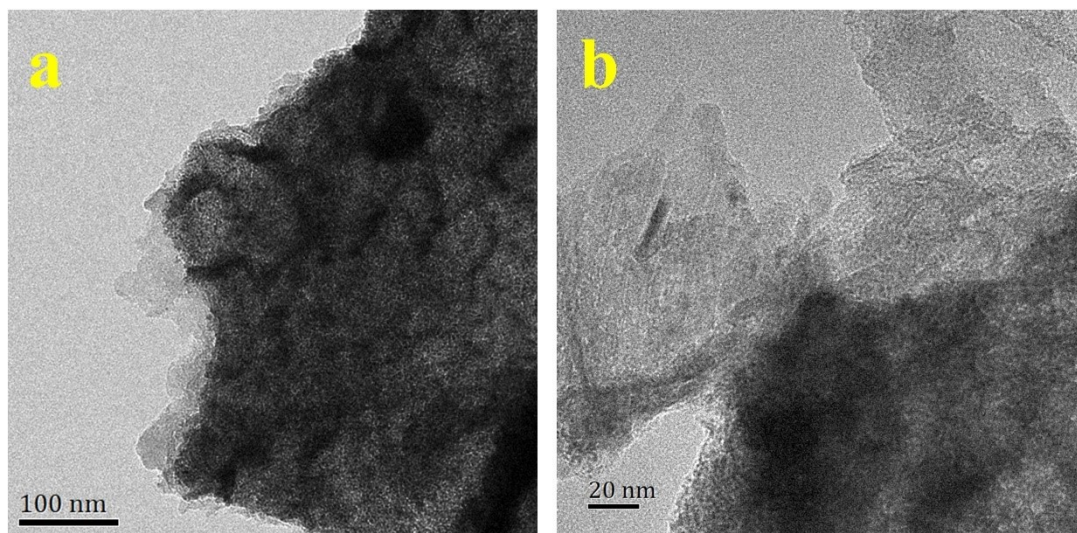

**Fig. S27** TEM and HRTEM images of Ru-NiFe-PBA-NF.

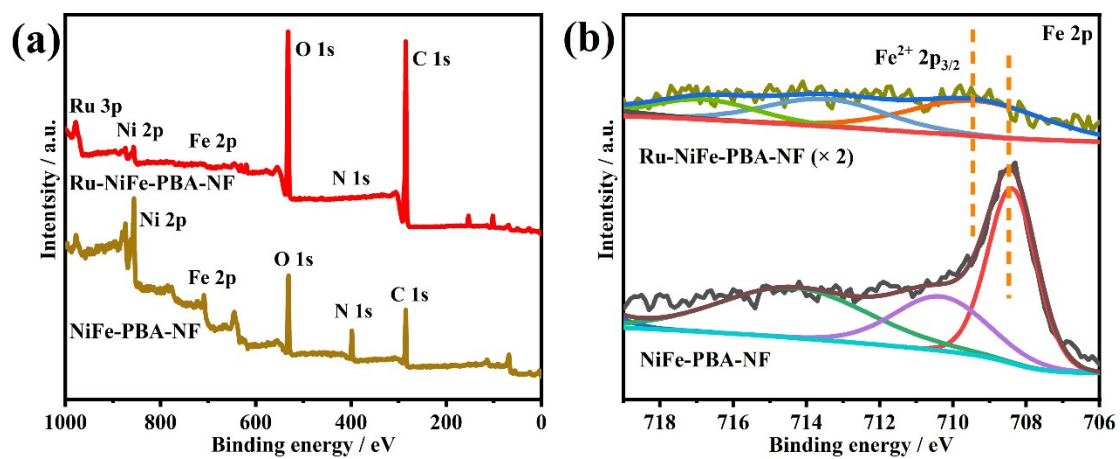

**Fig. S28** (a) Survey and (b) Fe 2p XPS spectra of Ru-NiFe-PBA-NF and NiFe-PBA-NF.

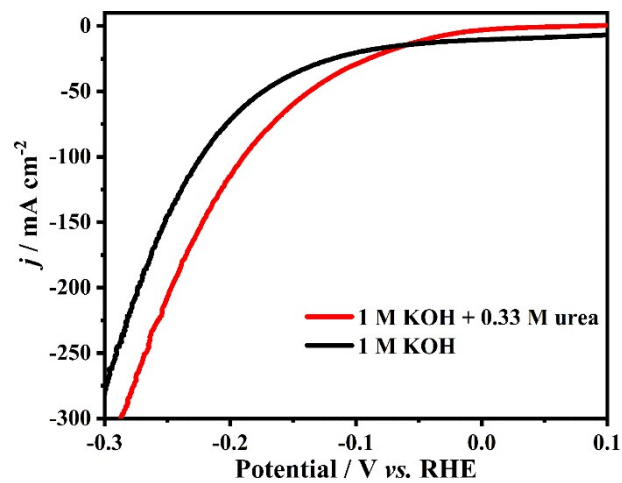

**Fig. S29** LSV curves of Ru-NiFe-PBA-NF in 1.0 M KOH with and without 0.33 M urea.

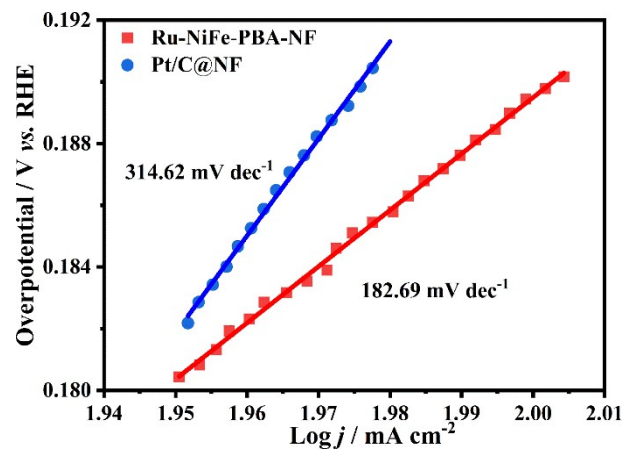

**Fig. S30** Tafel plots of Ru-NiFe-PBA-NF and Pt/C@NF at the overpotential region larger than 0.18 V.

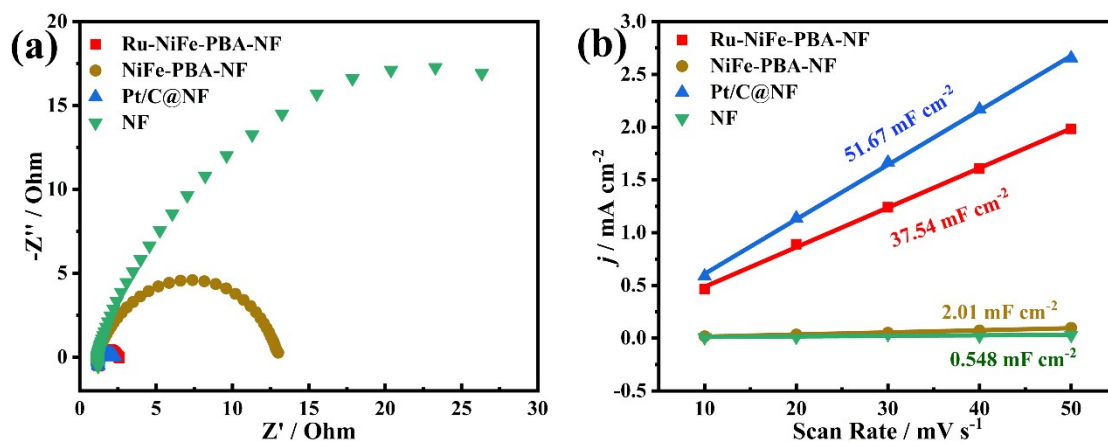

**Fig. S31** (a) EIS plots and (b) capacitance  $\Delta j$  ( $=j_a - j_c$ ) against scan rates of Ru-NiFe-PBA-NF, NiFe-PBA-NF, Pt/C@NF and NF in 1.0 M KOH with 0.33 M urea.

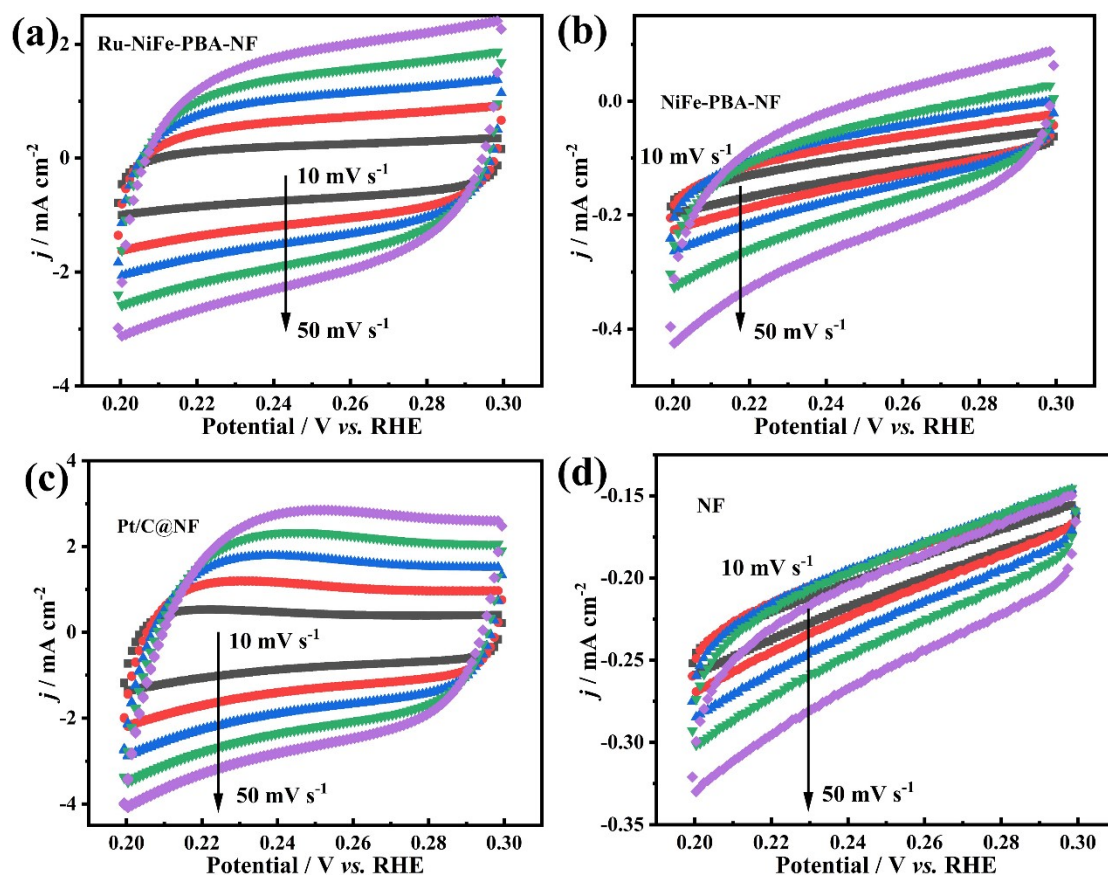

**Fig. S32** (a-d) CV curves at different scan rates for Ru-NiFe-PBA-NF, NiFe-PBA-NF, Pt/C@NF and NF in 1.0 M KOH with 0.33 M urea.

**Table S1** Comparison of the UOR performance of the recently reported Ni-based and other transition metal-based electrocatalysts.

| Electrocatalysts                                  | Electrolyte                    | Potentials@ $j_{UOR}$<br>(V @ mA cm <sup>-2</sup> ) | Tafel slope<br>(mV dec <sup>-1</sup> ) | Refs.            |
|---------------------------------------------------|--------------------------------|-----------------------------------------------------|----------------------------------------|------------------|
| <b>NiFe-PBA-NF</b>                                | <b>1.0 M KOH + 0.33 M urea</b> | <b>1.339 @ 10<br/>1.375 @ 100</b>                   | <b>30</b>                              | <b>This work</b> |
| pa-NiFe LDH NS/NIF                                | 1.0 M KOH + 0.33 M urea        | 1.459 @ 100                                         | 33                                     | 1                |
| NiFeRh-LDH                                        | 1.0 M KOH + 0.33 M urea        | 1.346 @ 10                                          | 35                                     | 2                |
| NiMoV LDH/NF                                      | 1.0 M KOH + 0.33 M urea        | 1.4 @ 100                                           | 24                                     | 3                |
| CoFeCr LDH/NF                                     | 1.0 M KOH + 0.33 M urea        | 1.41 @ 100                                          | 85                                     | 4                |
| Ni(OH) <sub>2</sub> @NF                           | 1.0 M KOH + 0.33 M urea        | 1.44 @ 100                                          | 24                                     | 5                |
| NiClO-D                                           | 1.0 M KOH + 0.33 M urea        | 1.44 @ 100                                          | 41                                     | 6                |
| NFO powders                                       | 1.0 M KOH + 0.33 M urea        | 1.4 @ 100                                           | 26                                     | 7                |
| CuCo <sub>2</sub> O <sub>4</sub>                  | 1.0 M KOH + 0.33 M urea        | 1.44 @ 100                                          | 46                                     | 8                |
| 1%Cu: Ni(OH) <sub>2</sub> /NF                     | 1.0 M KOH + 0.33 M urea        | 1.41 @ 100                                          | 42                                     | 9                |
| N-NiS/NiS <sub>2</sub>                            | 1.0 M KOH + 0.33 M urea        | 1.47 @ 100                                          | 28                                     | 10               |
| porous Ni(OH) <sub>2</sub> nanosheet              | 1.0 M KOH + 0.33 M urea        | 1.59 @ 100                                          | 43                                     | 11               |
| FeNi-MOF NSs                                      | 1.0 M KOH + 0.33 M urea        | 1.361 @ 10<br>1.385 @ 100                           | 28                                     | 12               |
| NP-NiFe (NP-Ni <sub>0.7</sub> Fe <sub>0.3</sub> ) | 1.0 M KOH + 0.33 M urea        | 1.5 @ 100                                           | 38                                     | 13               |
| Ni/NiO@NC                                         | 1.0 M KOH + 0.33 M urea        | 1.4 @ 100                                           | 19                                     | 14               |
| 1%Fe: $\alpha$ -Ni(OH) <sub>2</sub> /NF           | 1.0 M KOH + 0.33 M urea        | 1.4 @ 100                                           | 35                                     | 15               |
| Ni(OH) <sub>2</sub> nanoflakes                    | 1.0 M KOH + 0.33 M urea        | 1.48 @ 100                                          | 36                                     | 16               |



|                                                |                            |                         |    |    |
|------------------------------------------------|----------------------------|-------------------------|----|----|
| NiFe(OH) <sub>x</sub><br>nanoparticles/Ni foam | 1.0 M KOH + 0.33 M<br>urea | 1.395@ 100              | 29 | 17 |
| O-NiMoP/NF                                     | 1.0 M KOH + 0.5 M urea     | 1.41 @ 100              | 34 | 18 |
| NF/NiMoO-Ar                                    | 1.0 M KOH + 0.5 M urea     | 1.37 @ 10<br>1.42 @ 100 | 19 | 19 |
| MnO <sub>2</sub> /NF                           | 1.0 M KOH + 0.5 M urea     | 1.33 @ 10<br>1.45 @ 100 | 75 | 20 |
| P-CoNi <sub>2</sub> S <sub>4</sub>             | 1.0 M KOH + 0.5 M urea     | 1.367 @ 100             | 55 | 21 |
| NiCoP/CC                                       | 1.0 M KOH + 0.5 M urea     | 1.30 @ 10               | 49 | 22 |
| CoS <sub>2</sub> -MoS <sub>2</sub>             | 1.0 M KOH + 0.5 M urea     | 1.29 @ 10               | 32 | 23 |
| CoMn/CoMn <sub>2</sub> O <sub>4</sub>          | 1.0 M KOH + 0.5 M urea     | 1.32 @ 10<br>1.36 @ 100 | 38 | 24 |

**Table S2** Comparison of the hybrid water electrolysis performance of the recently reported Ni-based and other transition metal-based electrocatalysts.

| Catalyst                             | Organic compounds  | electrolyte    | Current density (mA cm <sup>-2</sup> ) | Voltage (V) | Refs.            |
|--------------------------------------|--------------------|----------------|----------------------------------------|-------------|------------------|
| <b>NiFe-PBA-NF//Ru-NiFe-PBA-NF</b>   | <b>0.33 M Urea</b> | <b>1 M KOH</b> | <b>10</b>                              | <b>1.36</b> | <b>This Work</b> |
|                                      |                    |                | <b>50</b>                              | <b>1.70</b> |                  |
| N-NiS/NiS <sub>2</sub>               | 0.33 M Urea        | 1 M KOH        | 10                                     | 1.62        | 10               |
|                                      |                    |                | 50                                     | ~1.84       |                  |
| FeNi-MOF NSs                         | 0.33 M Urea        | 1 M KOH        | 10                                     | 1.43        | 12               |
|                                      |                    |                | 50                                     | 1.70        |                  |
| NFO                                  | 0.33 M Urea        | 1 M KOH        | 10                                     | 1.455       | 15               |
|                                      |                    |                | 50                                     | 1.59        |                  |
| Ni <sub>2</sub> P/Ni-MOF@NF          | 0.33 M Urea        | 1 M KOH        | 10                                     | 1.50        | 25               |
| PBA@MOF-Ni/Se                        | 0.5 M Urea         | 1 M KOH        | 10                                     | 1.50        | 26               |
| NF/NiMoO-Ar//NF/NiMoO-H <sub>2</sub> | 0.5 M Urea         | 1 M KOH        | 10                                     | 1.38        | 20               |
|                                      |                    |                | 50                                     | 1.48        |                  |
| MOF-Ni@MOF-Fe-S                      | 0.5 M Urea         | 1 M KOH        | 10                                     | 1.539       | 27               |
|                                      |                    |                | 50                                     | ~1.75       |                  |
| CoS <sub>x</sub> /Co-MOF             | 0.5 M Urea         | 1 M KOH        | 10                                     | 1.48        | 28               |
|                                      |                    |                | 50                                     | ~1.70       |                  |
| Ni-MOF-0.5/NF                        | 0.5 M Urea         | 1 M KOH        | 10                                     | 1.52        | 29               |

|                                    |                      |         |    |       |    |
|------------------------------------|----------------------|---------|----|-------|----|
|                                    |                      |         | 50 | ~1.71 |    |
| Ni-Mo nanotube                     | 0.1 M Urea           | 1 M KOH | 10 | 1.43  | 30 |
|                                    |                      |         | 50 | ~1.64 |    |
| F modified $\beta$ -FeOOH          | 10 mM Ethanol        | 1 M KOH | 10 | 1.43  | 31 |
| Ni <sub>3</sub> S <sub>2</sub> /NF | 10 mM HMF            | 1 M KOH | 10 | 1.46  | 32 |
|                                    |                      |         | 50 | 1.58  |    |
| Ni <sub>2</sub> P/NF               | 10 mM HMF            | 1 M KOH | 10 | 1.44  | 33 |
|                                    |                      |         | 50 | 1.58  |    |
| Ni <sub>2</sub> P/Ni/NF            | 30 mM Furfural       | 1 M KOH | 10 | 1.48  | 34 |
| 3D hierarchically porous nickel    | 10 mM Benzyl alcohol | 1 M KOH | 10 | 1.50  | 35 |
|                                    |                      |         | 50 | 1.60  |    |

## References:

1. J. Xie, H. Qu, F. Lei, X. Peng, W. Liu, L. Gao, P. Hao, G. Cui and B. Tang, *J. Mater. Chem. A*, 2018, **6**, 16121–16129.
2. H. Sun, W. Zhang, J.-G. Li, Z. Li, X. Ao, K.-H. Xue, K. K. Ostrikov, J. Tang and C. Wang, *Appl. Catal. B: Environ.*, 2021, **284**, 119740.
3. Z. Wang, W. Liu, J. Bao, Y. Song, X. She, Y. Hua, G. Lv, J. Yuan, H. Li and H. Xu, *Chem. Eng. J.*, 2022, **430**, 133100.
4. Z. Wang, W. Liu, Y. Hu, M. Guan, L. Xu, H. Li, J. Bao and H. Li, *Appl. Catal. B: Environ.*, 2020, **272**, 118959.
5. L. Xia, Y. Liao, Y. Qing, H. Xu, Z. Gao, W. Li and Y. Wu, *ACS Appl. Energy Mater.*, 2020, **3**, 2996–3004.
6. L. Zhang, L. Wang, H. Lin, Y. Liu, J. Ye, Y. Wen, A. Chen, L. Wang, F. Ni, Z. Zhou, S. Sun, Y. Li, B. Zhang and H. Peng, *Angew. Chem., Int. Ed.*, 2019, **131**, 16976–16981.
7. F. Wu, G. Ou, J. Yang, H. Li, Y. Gao, F. Chen, Y. Wang and Y. Shi, *Chem. Commun.*, 2019, **55**, 6555–6558.
8. C. Zequine, F. Wang, X. Li, D. Guragain, S. R. Mishra, K. Siam, P. Kahol and R. Gupta, *Appl. Sci.*, 2019, **9**, 793.
9. J. Xie, L. Gao, S. Cao, W. Liu, F. Lei, P. Hao, X. Xia and B. Tang, *J. Mater. Chem. A*, 2019, **7**, 13577–13584.
10. H. Liu, Z. Liu, F. Wang and L. Feng, *Chem. Eng. J.*, 2020, **397**, 125507.
11. W. Yang, X. Yang, B. Li, J. Lin, H. Gao, C. Hou and X. Luo, *J. Mater. Chem. A*,

2019, **7**, 26364–26370.

12. X. Zhang, X. Fang, K. Zhu, W. Yuan, T. Jiang, H. Xue and J. Tian, *J. Power Sources*, 2022, **520**, 230882.

13. Z. Cao, T. Zhou, X. Ma, Y. Shen, Q. Deng, W. Zhang and Y. Zhao, *ACS Sustainable Chem. Eng.*, 2020, **8**, 11007–11015.

14. X. Ji, Y. Zhang, Z. Ma and Y. Qiu, *ChemSusChem*, 2020, **13**, 5004–5014.

15. J. Xie, W. Liu, F. Lei, X. Zhang, H. Qu, L. Gao, P. Hao, B. Tang and Y. Xie, *Chem. Eur. J.*, 2018, **24**, 18408–18412.

16. W. Yang, X. Yang, C. Hou, B. Li, H. Gao, J. Lin and X. Luo, *Appl. Catal. B: Environ.*, 2019, **259**, 118020.

17. X. L. Yang, Y. W. Lv, J. Hu, J. R. Zhao, G. Y. Xu, X. Q. Hao, P. Chen and M. Q. Yan, *RSC Adv*, 2021, **11**, 17352–17359.

18. H. Jiang, M. Sun, S. Wu, B. Huang, C. S. Lee and W. Zhang, *Adv. Funct. Mater.*, 2021, **31**, 2104951.

19. Z.-Y. Yu, C.-C. Lang, M.-R. Gao, Y. Chen, Q.-Q. Fu, Y. Duan and S.-H. Yu, *Energy Environ. Sci.*, 2018, **11**, 1890–1897.

20. S. Chen, J. Duan, A. Vasileff and S. Z. Qiao, *Angew. Chem., Int. Ed.*, 2016, **55**, 3804–3808.

21. X. F. Lu, S. L. Zhang, W. L. Sim, S. Gao and X. W. D. Lou, *Angew. Chem., Int. Ed.*, 2021, **133**, 23067–23073.

22. L. Sha, J. Yin, K. Ye, G. Wang, K. Zhu, K. Cheng, J. Yan, G. Wang and D. Cao, *J. Mater. Chem. A*, 2019, **7**, 9078–9085.

23. C. Li, Y. Liu, Z. Zhuo, H. Ju, D. Li, Y. Guo, X. Wu, H. Li and T. Zhai, *Adv. Energy Mater.*, 2018, **8**, 1801775.
24. C. Wang, H. Lu, Z. Mao, C. Yan, G. Shen and X. Wang, *Adv. Funct. Mater.*, 2020, **30**, 2000556.
25. H. Wang, H. Zou, Y. Liu, Z. Liu, W. Sun, K. A. Lin, T. Li and S. Luo, *Scientific Reports*, 2021, 11, **1**, 21414.
26. H. Xu, K. Ye, K. Zhu, Y. Gao, J. Yin, J. Yan, G. Wang and D. Cao, *Inorganic Chemistry Frontiers*, 2021, **8**, 2788–2797.
27. H. Xu, K. Ye, K. Zhu, J. Yin, J. Yan, G. Wang and D. Cao, *Dalton Trans.*, 2020, **49**, 5646–5652.
28. H. Xu, K. Ye, K. Zhu, J. Yin, J. Yan, G. Wang and D. Cao, *Inorg. Chem. Front.*, 2020, **7**, 2602–2610.
29. S. Zheng, Y. Zheng, H. Xue and H. Pang, *Chem. Eng. J.*, 2020, **395**, 125166.
30. J.-Y. Zhang, T. He, M. Wang, R. Qi, Y. Yan, Z. Dong, H. Liu, H. Wang and B. Y. Xia, *Nano Energy*, 2019, **60**, 894–902.
31. G.-F. Chen, Y. Luo, L.-X. Ding and H. Wang, *ACS Catal.*, 2018, **8**, 526–530.
32. B. You, X. Liu, N. Jiang and Y. Sun, *J. Am. Chem. Soc.*, 2016, **138**, 13639–13646.
33. B. You, N. Jiang, X. Liu and Y. Sun, *Angew. Chem., Int. Ed.*, 2016, **55**, 9913–9917.
34. N. Jiang, X. Liu, J. Dong, B. You, X. Liu and Y. Sun, *ChemNanoMat.*, 2017, **3**, 491–495.
35. B. You, X. Liu, X. Liu and Y. Sun, *ACS Catal.*, 2017, **7**, 4564–4570.
